# Supplementary material for: Patient Characteristics and Clinical Course of COVID-19 Patients Treated at a German Tertiary Center during the First and Second Waves in the Year 2020
Source: J Clin Med. 2021 May 24;10(11):2274. doi: 10.3390/jcm10112274 (PMC8197386; doi:10.3390/jcm10112274)
Supplement: Supplementary file 1 [file jcm-10-02274-s001.zip]

Archive with 8 entries (8 files):
- __MACOSX/._Table_S1.docx
- __MACOSX/._Table_S2.docx
- __MACOSX/._Table_S3.docx
- Figure_S1.pdf
- Figure_S2.pdf
- Table_S3.pdf
- Table_S1.pdf
- Table_S2.pdf
