# Supplementary material for: Patient Characteristics and Clinical Course of COVID-19 Patients Treated at a German Tertiary Center during the First and Second Waves in the Year 2020
Source: J Clin Med. 2021 May 24;10(11):2274. doi: 10.3390/jcm10112274 (PMC8197386; doi:10.3390/jcm10112274)
Supplement: Supplementary file 1 [file jcm-10-02274-s001.zip › Table_S1.pdf]

**Table S1.** Immunosuppression of COVID-19 patients

|                               | <b>All patients</b> | <b>First wave</b><br>(Feb 27 - Jul 28) | <b>Second wave</b><br>(Jul 29 – Dec 31) |
|-------------------------------|---------------------|----------------------------------------|-----------------------------------------|
| Total, n (%)                  | 108 (21)            | 41 (24)                                | 67 (20)                                 |
| Steroids, n (%)               | 52 (10)             | 15 (9)                                 | 37 (11)                                 |
| CNI/mTORI, n (%)              | 17 (3)              | 6 (3)                                  | 11 (3)                                  |
| Anti-TNF-alpha, n (%)         | 6 (1)               | 0                                      | 6 (2)                                   |
| MTX, n (%)                    | 7 (1)               | 2 (1)                                  | 5 (2)                                   |
| CD20 antibodies, n (%)        | 19 (4)              | 10 (6)                                 | 9 (3)                                   |
| Chemotherapy, n (%)           | 40 (8)              | 20 (11)                                | 20 (6)                                  |
| Leukemia, n (%)               | 19 (4)              | 14 (8)                                 | 5 (2)                                   |
| Lymphoma, n (%)               | 13 (3)              | 8 (5)                                  | 5 (2)                                   |
| HIV, n (%)                    | 2 (0)               | 0                                      | 2 (1)                                   |
| Solid Organ Transplant, n (%) | 26 (5)              | 7 (4)                                  | 19 (6)                                  |
| Allogenic HSCT, n (%)         | 7 (1)               | 5 (3)                                  | 2 (1)                                   |

Immunosuppression of 505 patients with SARS-CoV-2 infections at our center during the first or second COVID-19 wave in the year 2020. CNI, calcineurin inhibitor; mTORI, mTOR-inhibitor ; MTX, methotrexate Anti-CD20; HIV, human immunodeficiency virus; HCT, hematopoietic stem-cell transplantation
