# Supplementary material for: Patient Characteristics and Clinical Course of COVID-19 Patients Treated at a German Tertiary Center during the First and Second Waves in the Year 2020
Source: J Clin Med. 2021 May 24;10(11):2274. doi: 10.3390/jcm10112274 (PMC8197386; doi:10.3390/jcm10112274)
Supplement: Supplementary file 1 [file jcm-10-02274-s001.zip › Table_S2.pdf]

**Table S2.** Specific treatment

|                            | <b>All patients</b> | <b>First wave</b><br>(Feb 27 - Jul 28) | <b>Second wave</b><br>(Jul 29 – Dec 31) | <b>P</b> |
|----------------------------|---------------------|----------------------------------------|-----------------------------------------|----------|
| Remdesivir, n (%)          | 59 (12)             | 10 (6)                                 | 49 (15)                                 | 0.002    |
| Dexamethason, n (%)        | 95 (19)             | 0                                      | 95 (29)                                 | <0.001   |
| Convalescent plasma, n (%) | 14 (3)              | 6 (3)                                  | 8 (2)                                   | 0.57     |
| Hydroxychloroquin, n (%)   | 9 (2)               | 8 (5)                                  | 1 (1)                                   | 0.001    |
| Tocilizumab, n (%)         | 3 (1)               | 3 (2)                                  | 0                                       | 0.04     |
| Lopinavir/Ritonavir, n (%) | 8 (2)               | 8 (5)                                  | 0                                       | <0.001   |
| Adrecizumab, n (%)         | 8 (2)               | 8 (5)                                  | 0                                       | <0.001   |
