# Supplementary material for: Patient Characteristics and Clinical Course of COVID-19 Patients Treated at a German Tertiary Center during the First and Second Waves in the Year 2020
Source: J Clin Med. 2021 May 24;10(11):2274. doi: 10.3390/jcm10112274 (PMC8197386; doi:10.3390/jcm10112274)
Supplement: Supplementary file 1 [file jcm-10-02274-s001.zip › Table_S3.pdf]

**Table S3.** Multivariate logistic regression model

| <b>Variable</b>                | <b>OR</b> | <b>95% CI</b> | <b>P</b> |
|--------------------------------|-----------|---------------|----------|
| Presentation during first wave | 1.2       | 0.7 – 2.0     | 0.56     |
| Male sex                       | 1.7       | 1.0 – 2.9     | 0.05     |
| Age ≥ 60 years                 | 2.5       | 1.3 - 5.0     | 0.009    |
| ACCI                           | 1.2       | 1.1 - 1.4     | 0.001    |

OR, odds ratio; CI, confidence interval; ACCI, age-adjusted Charlson Comorbidity Index
